# Supplementary material
Source: publisher figshare collection journal article supplement (https://brill.figshare.com/ndownloader/files/14478968)
Supplement: Supplementary file 1 [file 14478968]

Lecture Two Handout

**Metaphorical Meaning Making: Discourse, Language, and Culture**

Meaning making: “Man is an animal suspended in webs of significance he himself has spun. I take culture to be those webs, and the analysis of it to be therefore not an experimental science in search of law but an interpretative one in search of meaning." (Geertz, 1973: 5).

“culture shock”

The brain (and the nervous system) is the organ that performs the many cognitive operations that are needed for making sense of experience and that include categorization, figure-ground alignment, framing knowledge, metaphorical understanding, and several others.

The brain and the cognitive operations used are universal.

However, these cognitive operations are not put to use in a universally similar manner.

**Three examples of meaning making**

*Spatial orientation*

“ego-centered,” or relativistic, spatial orientation system.

Guugu Yimithirr (Levinson 1996: 180):

Take, for example, the case of the Guugu Yimithirr speakers of N. Queensland, who utilize a system of spatial conception and description which is fundamentally different from that of English-speakers. Instead of concepts of relativistic space, wherein one object is located by reference to demarcated to regions projected out from another reference object (ego, or some landmark) according to *its* orientation, Guugu Yimithirr speakers use a system of absolute orientation (similar to cardinal directions) which fixes absolute angles regardless of the orientation of the reference object. Instead of notions like ‘in front of,’ ‘behind,’ ‘to the left of,’ ‘opposite,’ etc., which concepts are uncoded in the language, Guugu Yimithirr speakers must specify locations as (in rough English gloss) ‘to the North of,’ ‘to the South of,’ ‘to the East of,’ etc. The system is used at every level of scale, from millimeters to miles, for there is (effectively) no other system available in the language; there is simply no analogue of the Indo-European prepositional concepts.

*Social debates*

categorization. classical view of categories is based on the idea of essential features. Prototypes.

How do we make sense of social debates?

The traditional conception of art.

a work of art represents objective reality. a work of art is representational. a work of art is a physical object.

If they were essential features, they could not be so easily challenged and canceled.

Concepts like art assume a prototype-based organization, and it is their very structure that invites contestation.

*Nature of categorization*

Categories are mentally represented as frames, schemas, or models.

different individuals can interpret the “same” reality in different ways: “alternative construal”

similarity-based categories (family resemblance) vs. frame-based categories.

**Metaphorical meaning making**

real discourse.

***Metaphorical coherence in discourse***

Intertextuality:

Almighty God

Who called your servant Cuthbert

from keeping sheep to follow your son

and to be shepherd of your people.

Mercifully grant that we, following his

example and caring for those who are lost,

may bring them home to your fold.

Through your son.

Jesus Christ our Lord.

Amen.

the shepherd  Jesus

the lost sheep  the people who do not follow God

the fold of the sheep  the state of people following God

the shepherd bringing back the sheep  Jesus saving the people

“intratextual coherence”

Performance targets are identical to the puissance at the Horse of the Year Show. You know the one – the high-jump competition, where the poor, dumb horse is brought into the ring, asked to clear a massive red wall, and as a reward for its heroic effort is promptly brought back and asked to do it all over again, only higher.

I’ve never felt anything but admiration for those puissance horses which, not so dumb at all, swiftly realize that the game is a bogey. Why on earth should they bother straining heart, sinew and bone to leap higher than their own heads, only to be required to jump even higher? And then possibly higher still.

Hard work and willingness, ponders the clever horse as he chomps in the stable that night, clearly bring only punishment. And so next time he’s asked to canter up to the big red wall, he plants his front feet in the ground and shakes his head. And says, what do you take me for – an idiot? (Melanie Reid, *The Times*, Monday, February 4, 2008).

puissance horses  people

riders  managers

red walls  obstacles to the targets people have to achieve

having to jump over the obstacles  being subject to assessment

clearing the obstacles  achieving the targets

raising the obstacles  giving more difficult targets

Horse Show  life

Thus it is with work-related targets. Most of us will in the course of our careers be subject to performance assessments, where we are examined against the objectives we were set the previous year, then tasked with new ones.

Oh, the bar may be set at what the politicians regard as a reasonable height. Aspirational enough to keep them all in power. From the perspective of the weary horse, however, we’ve reached the point where whipping doesn’t work, but a carrot and a short rest just might.

# *Universality and variation in metaphor*

*spending your time* is expressed in Hungarian as *filling your time*. Are there any universal metaphors at all?

time is space: English, Mandarin Chinese, Hindi, and Sesotho.

an angry person is a pressurized container: English, Japanese, Chinese, Hungarian, Wolof, Zulu, Polish, and others, possess the metaphor to various degrees.

happiness is up: English, Chinese, Hungarian.

Event Structure metaphor: causes are forces, states are containers, purposes are destinations, action is motion, difficulties are impediments (to motion): English, Chinese, Hungarian.

knowing is seeing and mind is the body

self control is object possession, subject and self are adversaries, the self is a child: English, Japanese, and Hungarian.

How is it possible that such conceptual metaphors exist in such diverse languages and cultures? Three possibilities.

Chinese:

happy is up

Ta hen gao-xing.

he very high-spirit

He is very high-spirited/happy.

Ta xing congcong de.

he spirit rise-rise PRT

His spirits are rising and rising./He’s pleased and excited.

Zhe-xia tiqi le wo-de xingzhi.

this-moment raise ASP my mood

This time it lifted my mood/interest.

Hungarian:

happiness is up

Ez a film feldobott.

this the film up-threw-me

This film gave me a high.-This film made me happy.

Majd elszáll a boldogságtól.

almost away-flies-he/she the happiness-from

He/she is on cloud nine.

universal bodily experiences - conceptual metonymies

“complex metaphors” - “primary metaphors”

theories are buildings: logical organization is physical structure

happy is up

more is up, purposes are destinations, and intimacy is closeness.

animals are humans, humans are animals, humans are objects, objects are humans

# *Causes of Metaphor Variation*

spatial relations are parts of the body

What causes our metaphors to vary as they do?

differential experience and differential cognitive preferences.

Differential experience: differences in social-cultural context, in social and personal history, and in what we can term social and personal concern or interest (see Kövecses, 2005).

social-cultural context:

- “four humors”

- “nu” (corresponding to anger) bound up with the notion of “qi”

pressurized container metaphor.

human concern: sadness is down, sadness is a burden, and sadness is dark.

depression is a captor.

different cognitive operations: ‘experiential focus’

anger in English and Chinese.

metaphor versus metonymy: English and Malay.

manner is taste: *honey-tongued* and *lidah manis* (‘tongue sweet’) - *tight-lipped*

**Conclusions**

- how we make sense of our experiences—linguistic or otherwise.

- universal aspects and cross-cultural variety.

- a large part of our making sense of the world based on metaphorical ways of speaking and thinking.

- we make a large portion of our discourses coherent by means of metaphor.

- the most important causes that make metaphors either universal or culture-specific

- In metaphorical conceptualization, we are under pressure to accommodate both the force of the body and context. Our metaphorical meaning making is the function of these two forces.

**References**

Alverson, Hoyt. 1991. Metaphor and experience: Looking over the notion of image schema.” In *Beyond Metaphor: The Theory of Tropes in Anthropology*, J. Fernandez, ed., 94-117. Stanford: Stanford University Press.

Alverson, Hoyt. 1994. *Semantics and Experience: Universal Metaphors of time in English, Mandarin, Hindi, and Sesotho*. Baltimore: Johns Hopkins University Press.

Barcelona, Antonio. 2000. On the plausibility of claiming a metonymic motivation for conceptual metaphor. In *Metaphor and Metonymy at the Crossroads.* A. Barcelona, ed., 31-58. Berlin: Mouton de Gruyter.

Basso, Keith H. 1967. **Semantic Aspects of Linguistic Acculturation.** American Anthropologist, New Series, 69, 5: 471-477

Cameron, Lynne.2003. *Metaphor in Educational Discourse*. London: Continuum.

Cameron, Lynne. 2007. Patterns of metaphor use in reconciliation talk. *Discourse and Society*, *18*, 197-222.

Charteris-Black, Jonathan. 2003. Speaking with forked tongue: A comparative study of metaphor and metonymy in English and Malay phraseology. *Metaphor and Symbol*, 18, 4: 289-310.

Charteris-Black, Jonathan. 2004. Corpus Approaches to Critical Metaphor Analysis. Basingstoke & New York: Palgrave-MacMillan.

Chilton, Paul and Mikhail Ilyin. 1993. Metaphor in political discourse. The case of the 'Common European House'. *Discourse and Society* 4 (1):7-31.

Chilton, Paul. 1996. *Security Metaphors: Cold War Discourse from Containment to Common European Home*. Frankfurt: Peter Lang.

Clausner, T. and Croft, W. 1997. Productivity and schematicity in metaphors. *Cognitive Science,* Vol. 21 (3), 247–282.

Deignan, Alice. 1999. Corpus-based research into metaphor. In Lynne Cameron and Graham Low, eds. *Researching and Applying Metaphor*, 177-199. Cambridge: Cambridge University Press.

Deignan, Alice. 2005. *Metaphor and Corpus Linguistics*. Amsterdam: John Benjamins.

Dobrovolskij, Dmitrij and Elisabeth Piirainen. 2005. *Figurative Language. Cross-cultural and Cross-linguistic Perspectives*. Amsterdam: Elsevier.

Eubanks, Philip. 2000. *A War of Words in the Discourse of Trade. The Rhetorical Constitution of Metaphor.* Southern Illinois University Press.

Geeraerts, Dirk and Stephan Grondelaers. 1995. „Looking back at anger: cultural traditions and metaphorical patterns.” In J. Taylor and R. MacLaury (eds.) *Language and the cognitive construal of the world*. 153-179. Berlin: Gruyter.

Geertz, Clifford. 1973. *The Interpretation of Cultures*. New York: Basic Books.

Gevaert, Caroline. 2001. Anger in old and middle English: a ’hot’ topic? *Belgian Essays on Language and Literature.* 89–101.

Gevaert, Caroline. 2005. The anger is heat question: detecting cultural influence on the conceptualization of anger through diachronic corpus analysis. N. Delbacque, J. Van der Auwera, and G. Geeraerts, eds., *Perspectives on Variation: Sociolinguistic, Historical, Comparative.* Berlin: Mouton de Gruyter. 195-208.

Gibbs, Raymond W. 2006. *Embodiment and Cognitive Science*. New York: Cambridge University Press.

Goatly, Andrew. 1997. *The Language of Metaphors*. London: Routledge.

Goatly, Andrew. 2007. *Washing the Brain. Metaphor and Hidden Ideology*. Amsterdam: John Benjamins.

Grady, Joseph. 1997a. *Foundations of Meaning: Primary Metaphors and Primary Scenes.* Ph.D. diss. Department of Linguistics, University of California at Berkeley.

Grady, Joseph. 1997b. theories are building revisited. *Cognitive Linguistics* 8:267-290.

Heine, Bernd and Tania Kuteva. 2002. *World Lexicon of Grammaticalization.* Cambridge: Cambridge University Press.

Heine, Bernd, Ulrike Claudi, and Friederike Hünnemeyer. 1991. *Grammaticalization: A Conceptual Framework.* Chicago: University of Chicago Press.

Heine, Bernd. 1995. Conceptual grammaticalization and prediction. In *Language and the Cognitive Construal of the World*. J. Taylor and R. MacLaury, eds., 119-135. Berlin: Mouton de Gruyter.

Johnson, Mark. 1987. *The Body in the Mind.* Chicago: The University of Chicago Press.

King, Brian. 1989. *The conceptual structure of emotional experience in Chinese.* Ph.D. dissertation. Ohio State University.

Koller, Veronika. 2004/2008. Metaphor and Gender in Business Media Discourse: a Critical Cognitive Study. Basingstoke and New York: Palgrave.

Kövecses, Zoltán. 1990. *Emotion Concepts*. Berlin and New York: Springer-Verlag.

Kövecses, Zoltán. 2000. *Metaphor and Emotion.* New York and Cambridge: Cambridge University Press.

Kövecses, Zoltán. 2002. *Metaphor. A Practical Introduction*. New York: Oxford University Press.

Kövecses, Zoltán. 2005. *Metaphor in Culture. Universality and Variation*. New York: Cambridge University Press.

Kövecses, Zoltán. 2005. *Metaphor in Culture. Universality and Variation*. Cambridge and New York: Cambridge University Press.

Kövecses, Zoltán. 2006. *Language, Mind, and Culture. A Practical Introduction*. Oxford and New York: Oxford University Press.

Kövecses, Zoltán. Forthcoming, a. Conceptual metaphor theory: some criticisms and some alternative proposals. *Annual Review of Cognitive Linguistics*.

Kövecses, Zoltán. Forthcoming, b. Methodological issues in conceptual metaphor theory. In Hans-Joerg Schmid and Sandra Handl, eds., *Windows to the Mind. Metaphor, Metonymy, and Conceptual Blending*. Berlin: Mouton de Gruyter.

Kövecses, Zoltán. Forthcoming, c. Metaphor, culture, and discourse: the pressure of coherence. In *Metaphor and Discourses*, Andreas Musolff and Hans-Joerg Zinken, eds., Palgrave Macmillan.

Lakoff, George and Johnson, Mark. 1980. *Metaphors We Live By*. Chicago: The University of Chicago Press.

Lakoff, George and Mark Johnson. 1999. *Philosophy in the Flesh. The Embodied Mind and its Challenge to Western Thought.* New York: Basic Books.

Lakoff, George. 1987. *Women, Fire, and Dangerous Thing*. Chicago: The University of Chicago Press.

Lakoff, George. 1993. “The contemporary theory of metaphor.” In *Metaphor and Thought,* A. Ortony, ed., 202-251. Cambridge: Cambridge University Press.

Lakoff, George. 1996. *Moral Politics*. *How Liberals and Conservatives Think.* Chicago: The University of Chicago Press.

Langacker, Ronald. 1987. *Foundations of Cognitive Grammar. Theoretical Prerequisites*. Vol. 1. Stanford: Stanford University Press.

Levenson, R. W., P. Ekman, K. Heider, and W. V. Friesen. 1992. Emotion and autonomic nervous system activity in the Minangkabau of West Sumatra. *Journal of Personality and Social Psychology.* 62: 972-988.

Maalej, Zouhair. 2004. Figurative language in anger expressions in Tunisian Arabic: An extended view of embodiment. *Metaphor and Symbol*, 19: 1, 51-75.

McMullen, Linda and John Conway. 2002. Conventional metaphors for depression.” In *Verbal communication of emotion: interdisciplinary perspectives.* S. Fussell, ed., 167-181. Mahwah: Lawrence Erlbaum.

Musolff, Andreas. 2000. Political Imagery of Europe: a house without exit doors? *Journal of Multilingual and Multicultural Development* 21 (3):216-229.

Musolff, Andreas. 2004. *Metaphor and Political Discourse. Analogical Reasoning in Debates about Europe*. Basingstoke: Palgrave Macmillan.

Musolff, Andreas. 2006. Metaphor scenarios in public discourse. *Metaphor and Symbol* 21 (1):23-38.

Palmer, Gary. 1996. *Toward a Theory of Cultural Linguistics*. Austin: Texas University Press.

Pragglejaz Group. 2007. MIP: A method for identifying metaphorically used words in discourse. *Metaphor and Symbol* Vol. 22, No. 1: 1-39.

Rakova, Maria. 2002. The philosophy of embodied realism: A high price to pay? *Cognitive Linguistics* 13–3, 215–244.

Ritchie, David. 2003. ARGUMENT IS WAR” – Or is it a game of chess? Multiple meanings in the analysis of imiplicit metaphors. *Metaphor and Symbol*, 18(2), 125-146.

Ritchie, David. 2004a.  Metaphors in Conversational Context:  Toward a Connectivity Theory of Metaphor Interpretation.  *Metaphor and Symbol, 19*, 265-287.

Ritchie, David. 2004b.  Common Ground in Metaphor Theory:  Continuing the Conversation.  *Metaphor and Symbol, 19*, 233-244.

Semino, Elena. 2005. The metaphorical construction of complex domains: The case of speech activity in English. *Metaphor and Symbol,* 20–21, 35–70.

Semino, Elena. In press/ 2008. *Metaphor in Discourse*. Cambridge: Cambridge University Press.

Steen, Gerard. 1999. From linguistic to conceptual metaphor in five steps. In R. Gibbs and G. Steen (eds.). *Metaphor in Cognitive Linguistics.* Amsterdam: John Benjamins. 57–77.

Stefanowitch, Anatol. 2007. Words and their metaphors. In *Corpus-based Approaches to Metaphor and Metonymy*. Anatol Stefanowitch and Stefan Th. Gries, eds. 64-105. Berlin: Mouton de Gruyter.

Sweetser, Eve. 1990. *From Etymology to Pragmatics.* Cambridge/New York: Cambridge University Press.

Turner, Mark. 2001. *Cognitive Dimensions of Social Science*. Oxford and New York: Oxford University Press.

Yu, Ning. 1995. Metaphorical expressions of anger and happiness in English and Chinese. *Metaphor and Symbolic Activity 10:* 59-92.

Yu, Ning. 1998. *The contemporary theory of metaphor in Chinese: A perspective from Chinese.* Amsterdam: John Benjamins.

Zinken, Joerg. 2007. Discourse metaphors: the link between figurative language and habitual analogies'. Cognitive Linguistics, 18(3), pp. 445-466.
